# Supplementary material for: A Snapshot on the Occurrence and Risk Assessment of Organic Pollutants in an Urban River
Source: MDPI journal article supplement (doi:10.3390/app13010146), 2022-12-22
Supplement: s1 [file s1]

# **A Snapshot on the Occurrence and Risk Assessment of Organic Pollutants in an Urban River**

**Moisés Canle <sup>1,\*</sup> and Ana M. Antão-Geraldes <sup>2,3,\*</sup>**

<sup>1</sup> React! Department of Chemistry, Faculty of Sciences & CICA, University of A Coruña,  
E-15071 A Coruña, Spain

<sup>2</sup> Centro de Investigação de Montanha (CIMO), Instituto Politécnico de Bragança, Campus de Santa  
Apolónia, 5300-253 Bragança, Portugal

<sup>3</sup> Laboratório Associado para a Sustentabilidade e Tecnologia em Regiões de Montanha (SusTEC),  
Instituto Politécnico de Bragança, Campus de Santa Apolónia, 5300-253 Bragança, Portugal

\* Correspondence: moises.canle@udc.es (M.C.); gerald@ipb.pt (A.M.A.-G.)

**Table S1.** CECs concentrations reported in surface waters and sediments in different European countries.

|                           | <b>River (Country)</b>                                    | <b>Water Concentration<br/>(ng L<sup>-1</sup>)</b> | <b>Sediment Concentration<br/>(ng g<sup>-1</sup>)</b> | <b>References</b>    |
|---------------------------|-----------------------------------------------------------|----------------------------------------------------|-------------------------------------------------------|----------------------|
| Paracetamol/Acetaminophen | <b>Fervença River (Portugal)</b>                          | <b>0.05</b>                                        | <b>0.05 (ng L<sup>-1</sup>)</b>                       | <b>Present study</b> |
|                           | Hogsmill ,Chertsey, Blackwater Rivers (UK)                | < 0.93 – 415                                       | < 0.93 – 1.11                                         | [117]                |
|                           | Thames River (UK)                                         | 8.2-12,000                                         |                                                       | [118]                |
|                           | Kalamas River, Lake Pamvotis (Greece)                     | n.d. – 156                                         |                                                       | [119]                |
|                           | Lis River ( Portugal)                                     | n.d. – 527                                         |                                                       | [38]                 |
|                           | Dee River (Scotland)                                      | n.d.-658                                           |                                                       | [120]                |
|                           | Leitzaran, Mustarre and Oria Rivers (Spain)               | n.d.-6.1                                           |                                                       | [121]                |
|                           | Guadalhorce River (Spain)                                 | 79-200                                             |                                                       | [122]                |
|                           | Llobregat Basin (Spain)                                   | 0.60-2,420                                         |                                                       | [123]                |
|                           | Valencia Mediterranean rivers (Spain)                     | 1,968 (max detected)                               |                                                       | [124]                |
|                           | Llobregat River Basin (Spain)                             | 4.4 – 1060                                         |                                                       | [125]                |
|                           | Mijares River (Spain)                                     | n.d.-197                                           |                                                       | [126]                |
|                           | Lakes Vänern Vättern Mälaren/associated rivers (Sweden)   | 34 (max)                                           |                                                       | [127]                |
| Ibuprofen                 | <b>Fervença River (Portugal)</b>                          | <b>0.05-21.91</b>                                  | <b>0.05-18.80 (ng L<sup>-1</sup>)</b>                 | <b>Present study</b> |
|                           | Elbe basin (Czech Republic)                               | 7.33-3,210.25                                      |                                                       | [128]                |
|                           | Thames River (UK)                                         | 30-450                                             |                                                       | [118]                |
|                           | Lake Päijänne, River Vantaa (Finland)                     | 2.8-187                                            |                                                       | [129]                |
|                           | Kalamas River, Lake Pamvotis (Greece)                     | n.d. – 1,351                                       |                                                       | [119]                |
|                           | Lakes Vänern Vättern Mälaren / associated rivers (Sweden) | < 3.1                                              |                                                       | [127]                |
|                           | Douro River (Portugal)                                    | n.d.- 232 ± 7                                      |                                                       | [37]                 |
|                           | Minho River (Portugal)                                    | 204 ± 10                                           |                                                       | [37]                 |
|                           | Ave River (Portugal)                                      | n.d.- 343 ± 19                                     |                                                       | [37]                 |
|                           | Lima River (Portugal)                                     | 40 ± 2-723 ± 6                                     |                                                       | [37]                 |
|                           | Leça River (Portugal)                                     | n.d. 256 ± 9                                       |                                                       | [37]                 |

|            |                                            |                      |                                       |                      |
|------------|--------------------------------------------|----------------------|---------------------------------------|----------------------|
|            | Rabaçal River (Portugal, Douro tributary)  | n.d.                 |                                       | [37]                 |
|            | Tinhela River (Portugal)                   | n.d.                 |                                       | [37]                 |
|            | Tâmega River (Portugal)                    | 81 ± 6- 359 ± 12     |                                       | [37]                 |
|            | Uíma River (Portugal)                      | nd-173 ± 3           |                                       | [37]                 |
|            | Cabrum River (Portugal)                    | nd                   |                                       | [37]                 |
|            | Lis River ( Portugal)                      | n.d. – 1317          |                                       | [38]                 |
|            | Dee River (Scotland)                       | 0.1-17.2             |                                       | [120]                |
|            | Danube Basin (Serbia)                      | n.d. -163            |                                       | [18]                 |
|            | Danube River (Serbia)                      | n.d-60.1             |                                       | [130]                |
|            | Danube River (Serbia)                      | <LOQ—346             |                                       | [95]                 |
|            | Llobregat Basin (Spain)                    | 160-9,890            |                                       | [123]                |
|            | Valencia Mediterranean rivers (Spain)      | 2,850 (max detected) |                                       | [124]                |
|            | Llobregat River Basin (Spain)              | 29.4-490.4           |                                       | [131]                |
|            | Llobregat River Basin (Spain)              | 2.7 – 868            |                                       | [125]                |
| Diclofenac | <b>Fervença River (Portugal)</b>           | <b>0.05-398.35</b>   | <b>0.05-92.93 (ng L<sup>-1</sup>)</b> | <b>Present study</b> |
|            | Elbe basin (Czech Republic)                | 1.46-1,070.28        |                                       | [128]                |
|            | Hogsmill, Chertsey, Blackwater Rivers (UK) | < 0.96 – 253         | < 0.96 – 6.4                          | [117]                |
|            | Thames River (UK)                          | 5.9-380              |                                       | [118]                |
|            | Lake Päijänne, River Vantaa (Finland)      | n.d.-227             |                                       | [129]                |
|            | Several streams (Germany)                  | <5-370               |                                       | [132]                |
|            | Kalamas River, Lake Pamvotis (Greece)      | n.d. – 457           |                                       | [119]                |
|            | Several urban streams (Hungary)            | 0.66-2,070.76        | 1.43-47.31                            | [78]                 |
|            | Lis River ( Portugal)                      | n.d. – 38            |                                       | [38]                 |
|            | Sousa River (Portugal)                     | 3,200                |                                       | [98]                 |
|            | Ave River (Portugal)                       | 388                  |                                       | [98]                 |
|            | Danube river (Romania)                     | n.d.-166             |                                       | [133]                |
|            | Prut River (Romania)                       | 2-9                  |                                       | [134]                |
|            | Dee River (Scotland)                       | 0.2-29.1             |                                       | [120]                |
|            | Sava River (Slovenia and Croatia)          | 62                   |                                       | [135]                |
|            | Llobregat River Basin (Spain)              | 0.4 – 786            |                                       | [125]                |
|            | Miño River basin (Spain)                   | 2.8 – 46.0           |                                       | [136]                |

|                  |                                                             |                    |                                       |                      |
|------------------|-------------------------------------------------------------|--------------------|---------------------------------------|----------------------|
|                  | Mijares River (Spain)                                       | n.d.-578           |                                       | [126]                |
|                  | Guadalhorce river, Spain                                    | 1-83               |                                       | [122]                |
|                  | Llobregat Basin (Spain)                                     | 0.08-18.78 (ug)    |                                       | [123]                |
|                  | Valencia Mediterranean rivers (Spain)                       | 358 (max detected) |                                       | [124]                |
|                  | Llobregat River Basin (Spain)                               | 17.6-358.1         |                                       | [131]                |
|                  | Danube river (Serbia)                                       | <LOQ—324           |                                       | [95]                 |
|                  | Turia River Basin                                           |                    | 100                                   | [137]                |
|                  | Lakes Vänern Vättern Mälaren and associated rivers (Sweden) | 200 (max detected) |                                       | [127]                |
| Clorofibric acid | <b>Fervença River (Portugal)</b>                            | <b>0.05</b>        | <b>0.05-21.47 (ng L<sup>-1</sup>)</b> | <b>Present study</b> |
|                  | Danube river (Romenia)                                      | n.d.-4.3           |                                       | [133]                |
|                  | Llobregat Basin (spain)                                     | 10-7,910           |                                       | [123]                |
|                  | Llobregat River Basin (Spain)                               | 21-133             |                                       | [131]                |
|                  | Lake Mälaren (Sweden)                                       | <2-3.6             | n.d                                   | [139]                |
| Carbamazepine    | <b>Fervença River (Portugal)</b>                            | <b>0.05-52.10</b>  | <b>0.05-47.10 (ng L<sup>-1</sup>)</b> | <b>Present study</b> |
|                  | Lake Päijänne, River Vantaa (Filand)                        | 0.4-65             |                                       | [129]                |
|                  | Henares-Jarama-Tajo basin (Madrid, Spain)                   | n.d-104            |                                       | [139]                |
|                  | Danube River (Serbia)                                       | n.d.-130           |                                       | [140]                |
|                  | Sava River (Serbia)                                         | 29-50              |                                       | [140]                |
|                  | Tamis River (Serbia)                                        | 30                 |                                       | [140]                |
|                  | River Foss (UK)                                             | n.d.-195           |                                       | [141]                |
|                  | River Ouse (UK)                                             | 1-54.4             |                                       | [141]                |
|                  | Tâmega River (Portugal)                                     | n.d.               |                                       | [41]                 |
|                  | Tua River ( Portugal)                                       | n.d.               |                                       | [41]                 |
|                  | Mondego River (Portugal)                                    | n.d.               |                                       | [41]                 |
|                  | Trancão River (Portugal)                                    | n.d.-<10.90        |                                       | [41]                 |
|                  | Tagus River (Portugal)                                      | n.d.               |                                       | [41]                 |
|                  | Xarrama River Portugal)                                     | n.d.               |                                       | [41]                 |
|                  | Guadiana River ( Portugal)                                  | n.d.               |                                       | [41]                 |
|                  | Ave River (Portugal)                                        | n.d.-24.50         |                                       | [36]                 |

|           |                                                          |                    |                                 |                      |
|-----------|----------------------------------------------------------|--------------------|---------------------------------|----------------------|
|           | Leça River (Portugal)                                    | n.d.-98.59         |                                 | [36]                 |
|           | Antuã River (Portugal)                                   | 3.43-81.13         |                                 | [36]                 |
|           | Cértima River (Portugal)                                 | 3.96-177.01        |                                 | [36]                 |
|           | Arade River (Portugal)                                   | 13-31              |                                 | [142]                |
|           | Lis River (Portugal)                                     | 24.9-214           |                                 | [38]                 |
|           | Lake Mälaren (Sweden)                                    | 2.1-2.9            | 0.14-0.21                       | [138]                |
|           | Prut River (Romania)                                     | 29-72              |                                 | [134]                |
|           | Several streams (Germany)                                | <5-68              |                                 | [132]                |
|           | Danube river (Romania)                                   | n.d.-40            |                                 | [133]                |
|           | Several urban streams (Hungary)                          | 0.34-58,889.6      | 0.11-395.92                     | [78]                 |
|           | Llobregat River Basin (Spain)                            | 1.2 – 266.7        |                                 | [125]                |
|           | Rur River Basin (Germany)                                | n.d. -400          |                                 | [143]                |
|           | Thames River (England)                                   | 5.9-350            |                                 | [118]                |
|           | Dee River (Scotland)                                     | 0.1-7              |                                 | [120]                |
|           | Guadalhorce river (Spain)                                | 0.2-185            |                                 | [122]                |
|           | Donets River Basin (Ukraine)                             | n.d-65.7           |                                 | [144]                |
|           | Danube River (Serbia)                                    | 2.56-22.9          |                                 | [130]                |
|           | Lakes Vänern Vättern Mälaren /associated rivers (Sweden) | 21 (max detected)  |                                 | [127]                |
|           | Danube basin (Serbia)                                    | 94 -473            |                                 | [18]                 |
|           | Llobregat Basin (Spain)                                  | 80-3,090           |                                 | [123]                |
|           | Douro River (Portugal)                                   | <MDL-n.d.          | n.d                             | [46]                 |
|           | Leça River (Portugal)                                    | 206-354            | <MDL                            | [44]                 |
| Ofloxacin | <b>Fervença River (Portugal)</b>                         | <b>0.05-376.16</b> | <b>0.05 (ng L<sup>-1</sup>)</b> | <b>Present study</b> |
|           | Olona (Italy)                                            | n.d. -1.90         |                                 | [145]                |
|           | Lambro (Italy)                                           | 19.31-306.10       |                                 | [145]                |
|           | Po (Italy)                                               | n.d.-36.91         |                                 | [145]                |
|           | Lambro river, Italy                                      | 306                |                                 | [146]                |
|           | Ave River (Portugal)                                     | n.d.               |                                 | [36]                 |
|           | Leça River (Portugal)                                    | n.d.               |                                 | [36]                 |
|           | Antuã River (Portugal)                                   | n.d.               |                                 | [36]                 |

|            |                                                             |                      |                                        |                      |
|------------|-------------------------------------------------------------|----------------------|----------------------------------------|----------------------|
|            | Cértima River (l Portugal)                                  | n.d.                 |                                        | [36]                 |
|            | Llobregat River Basin (Spain)                               | n.d. – 488.4         |                                        | [125]                |
|            | Guadalhorce river, Spain                                    | 84                   |                                        | [122]                |
|            | Llobregat Basin (spain)                                     | 190-887              |                                        | [123]                |
|            | Valencia Mediterranean rivers (spain)                       | 2,850 (max detected) |                                        | [124]                |
|            | Llobregat River Basin (Spain)                               | 8.0-1,903.6          |                                        | [131]                |
|            | Guadalhorce river, Spain                                    | 6-89                 |                                        | [122]                |
|            | River Leça (Portugal)                                       | n.d.-120             | n.d.                                   | [46]                 |
|            | River Douro (Portugal)                                      | n.d.                 | n.d.                                   | [44]                 |
| Caffeine   | <b>Fervença River (Portugal)</b>                            | <b>3.17-167.38</b>   | <b>14.43-92.60 (ng L<sup>-1</sup>)</b> | <b>Present study</b> |
|            | Lake Mälaren (Sweden)                                       | 8.7-12               | 1.1-1.8                                | [138]                |
|            | Kalamas River, Lake Pamvotis (Greece)                       | 125 – 3506           |                                        | [119]                |
|            | Guadalquivir River (Spain)                                  | 91.9 (mean)          |                                        | [147]                |
|            | Rur River basin (Germany)                                   | n.d. -170            |                                        | [146]                |
|            | Prut River (Romania)                                        | 26-46                |                                        | [134]                |
|            | Several urban streams (Hungary)                             | 11.36-221,385        | 15.76-153.61                           | [78]                 |
|            | Rivers Leitzaran, Mustarre and Oria (Spain)                 | n.d.-12              |                                        | [121]                |
|            | Guadalhorce river, Spain                                    | 3-568                |                                        | [122]                |
|            | Danube River (Serbia)                                       | 1.11-621             |                                        | [130]                |
|            | Lakes Vänern Vättern Mälaren and associated rivers (Sweden) | 880 (max)            |                                        | [127]                |
|            | Danube basin (Serbia)                                       | 131- 5,540           |                                        | [30]                 |
|            | River Liz (Portugal)                                        | 25.3-321             |                                        | [43]                 |
|            | Danube Basin (Romania)                                      | 4,820 (mean value)   |                                        | [149]                |
| Galaxolide | <b>Fervença River (Portugal)</b>                            | <b>0.05-224.36</b>   | <b>0.05 (ng L<sup>-1</sup>)</b>        | <b>Present study</b> |
|            | Rur River basin (Germany)                                   | n.d.-170             |                                        | [143]                |
|            | Prut River (Romania)                                        | 59-280               |                                        | [134]                |
|            | Guadalhorce River (Spain)                                   | 890-26990            |                                        | [122]                |
|            | Ave River(Portugal)                                         | n.d- 61.6            |                                        | [45]                 |
|            | Leça River(Portugal)                                        | 8.4-379.2-           |                                        | [45]                 |
|            | Antuã River(Portugal)                                       | 7.0-121              |                                        | [45]                 |

|             |                                              |                     |                                          |                      |
|-------------|----------------------------------------------|---------------------|------------------------------------------|----------------------|
|             | Molgora River (Italy)                        | up to 1,141         | 3.5E <sup>-04</sup> –7,993*              | [149]                |
| Tonalide    | <b>Fervença River (Portugal)</b>             | <b>0.05-231.5</b>   | <b>0.05 (ng L<sup>-1</sup>)</b>          | <b>Present study</b> |
|             | Rur River basin (Germany)                    | n.d. -30            |                                          | [143]                |
|             | Prut River (Romania)                         | 10-38               |                                          | [134]                |
|             | Guadalhorce river, Spain                     | 266-1,408           |                                          | [122]                |
|             | Ave River (Portugal)                         | n.d. -7.3           |                                          | [45]                 |
|             | Leça River (Portugal)                        | 2.2-60.6            |                                          | [45]                 |
|             | Antuã River (Portugal)                       | 2.7-22.2            |                                          | [45]                 |
|             | Molgora River (Italy)                        | up to 365           | < 3.5E <sup>-04</sup> –4,321*            | [149]                |
| Bisphenol A | <b>Fervença River (Portugal)</b>             | <b>90.95-212.18</b> | <b>134.94-772.85 (ng L<sup>-1</sup>)</b> | <b>Present study</b> |
|             | Ebre river (Spain)                           | 61-101              | 0.24-117                                 | [150]                |
|             | Hogsmill, Chertsey, Blackwater Rivers (UK)   | < 3.87 – 1,420      | < 3.87 – 67.1                            | [117]                |
|             | Ave river (Portugal)                         | 7.9 – 521.8         |                                          | [44]                 |
|             | Svitava / Svratka Rivers (Czech Republic)    | 0.7-38.7            | 45.6-62.3                                | [151]                |
|             | Besos basin (Spain)                          | n.d. -587           |                                          | [152]                |
|             | Seine River basin (France)                   | 7.2-127             |                                          | [153]                |
|             | Study of 124 water courses/18 lakes (France) |                     | 8.5-226                                  | [154]                |
|             | Aisonas River (Greece)                       | 55-162              |                                          | [155]                |
|             | Turia River Basin (Spain)                    | 4-325               |                                          | [137]                |
|             | Danube basin (Serbia)                        | 28- 407             |                                          | [18]                 |
|             | Danube (Serbia)                              | <LOD-105.7          |                                          | [77]                 |

\* Suspended sediments.

**Table S2.** PAHs' and PCBs' concentrations reported in sediments in different European countries.

|      | River (Country)                  | $\Sigma$  | Concentration (ng g <sup>-1</sup> dw) | Reference            |
|------|----------------------------------|-----------|---------------------------------------|----------------------|
| PAHs | <b>Fervença River (Portugal)</b> | <b>16</b> | <b>10.39-52.91</b>                    | <b>Present study</b> |
|      | Bardello River (Italy)           | 18        | 478.5 ± 319.1                         | [156]                |
|      | Boesio River (Italy)             | 18        | 1296.1 ± 2791.4                       | [156]                |
|      | Margorabia River (Italy)         | 18        | 422.7 ± 348.6                         | [156]                |
|      | Toce River (Italy)               | 18        | 145.7 ± 77.1                          | [156]                |
|      | Tresa River (Italy)              | 18        | 4651.2 ± 22,198.3                     | [156]                |
|      | Huveaune River (France)          | 16        | 572 - 4235                            | [64]                 |
|      | Someșu Mic River (Romania)       | 16        | 24.8 - 575.6                          | [157]                |
|      | Durance River(France)            | 16        | 57–1528                               | [65]                 |
|      | Scheldt Basin (Belgium/ France)  | 16        | 9.01 ± 6.69 (mg/kg)                   | [158]                |
|      | Upper Danube basin (Hungry)      |           | 8.3 to 1,202.5                        | [159]                |
|      | Donets River Basin (Ukraine)     |           | 55.8-367.2                            | [144]                |
|      | Eure River (France)              | 16        | 2.27-38.20 (mg/kg)                    | [160]                |
|      | Rhine River (Germany)            | 16        | 393-24,434                            | [162]                |
|      | Danube River (Hungry)            | 17        | 8.3–1,202.5                           | [163]                |
|      | Danube River (Serbia)            | 16        | 29.7–1,047                            | [30]                 |
| PCBs | <b>Fervença River (Portugal)</b> | <b>18</b> | <b>5.06-6.76 (total)</b>              | <b>Present study</b> |
|      |                                  |           | <b>2.21-4.22 (IPCBs)</b>              |                      |
|      | Bardello River (Italy)           | 14        | 16.9 ± 18.3                           | [156]                |
|      | Boesio River (Italy)             | 14        | 15.2 ± 14.7                           | [156]                |
|      | Margorabia River (Italy)         | 14        | 7.1 ± 6.4                             | [156]                |
|      | Toce River (Italy)               | 14        | 5.5 ± 7.1                             | [156]                |
|      | Tresa River (Italy)              | 14        | 7.7 ± 5.3                             | [156]                |
|      | Huveaune River (France)          | 7         | 2.8 - 435                             | [64]                 |
|      | Someșu Mic (Romania)             | 20        | 2.7 - 252.7                           | [157]                |
|      | Durance River(France)            | 7         | 0.03 - 13.13                          | [65]                 |



|                                       |                           |                       |       |
|---------------------------------------|---------------------------|-----------------------|-------|
| Scheldt Basin (Belgium/ France)       | 28*                       | 0.23–7.34             | [158] |
| Donets River Basin (Ukraine)          | 7                         | 2 - 15                | [144] |
| Neva River (Russia)                   | DL PCB                    | 159-24,660 (pg g-1)   | [161] |
| Rhine River (Germany)                 | (28,53,101,128,153 e 180) | 11,8-580              | [162] |
| Danube River (Hungry)                 | (28,53,101,128,153 e 180) | 90 and 953            | [163] |
| Danube River (Serbia)                 | 47                        | 0.928 -32.1           | [30]  |
| Eure River (France)                   | -                         | 0.02 - 1.57 (mg kg-1) | [161] |
| Tiber River (Italy)                   | 32                        | 62.04-79.30           | [164] |
| Loreto River (Mondego Basin-Portugal) | 10                        | 0.47–5.3              | [51]  |

---

\* only PCB 153 was detected.

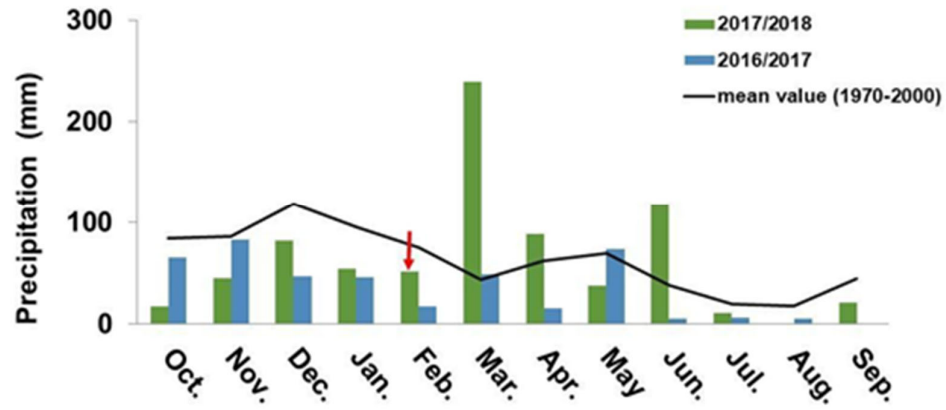

**Figure S1.** Precipitation during the hydrological years 2016/2017 and 2017/2018 in Bragança. The arrow indicates the month of sampling (February 2018). Source: [165].

**Table S3.** Toxicological data ng L<sup>-1</sup> in literature and values of Predicted non Observed Effect Concentrations (PNEC) for the selected CECs dissolved in freshwater.

|                | Selected organism                        | Endpoint                                          | Effect Measured  | Concentration ng·l <sup>-1</sup> | Af   | Lowest PNEC ng·l <sup>-1</sup> | References |
|----------------|------------------------------------------|---------------------------------------------------|------------------|----------------------------------|------|--------------------------------|------------|
| Paracetamol    | Crustacea<br>( <i>D. magna</i> )         | Immobility                                        | EC50<br>(a 48 h) | 30,100                           | 1000 | 30                             | [5,166]    |
| Ibuprofen      | Fish<br>( <i>O. latipes</i> )            | Survival                                          | NOEC<br>(c120 d) | 100                              | 10   | 10                             | [13,167]   |
| Diclofenac     | Fish<br>( <i>S. trutta</i> )             | monocyte<br>infiltration/accumulation<br>in liver | NOEC<br>(c21 d)  | 500                              | 10   | 50                             | [5,12,83]  |
| Clofibric Acid | Fish<br>( <i>G. holbrooki</i> )          | Enzymatic activity                                | NOEC<br>(c28 d)  | 75,000                           | 10   | 7,500                          | [168,169]  |
| Carbamazepine  | Crustacea<br>( <i>C. dubia</i> )         | Reproduction                                      | NOEC<br>(c7 d)   | 25,000                           | 10   | 2,500                          | [170]      |
| Ofloxacin      | Algae<br>-                               | -                                                 | NOEC<br>(c-)     | 1,300                            | 10   | 130                            | [5,13]     |
| Caffeine       | Annelida<br>( <i>D. neapolitana</i> )    | Body regeneration                                 | NOEC<br>(c28 d)  | 500                              | 10   | 50                             | [9,15,171] |
| Galaxolide     | Crustacea<br>( <i>A. tonsa</i> )         | Growth                                            | NOEC<br>(c 5 d)  | 44,000                           | 10   | 4,400                          | [172]      |
| Tonalide       | Fish<br>( <i>P. promelas</i> )           | Survival                                          | NOEC<br>( c36 d) | 35,000                           | 10   | 3,500                          | [173]      |
| Bisphenol A    | Insecta larvae<br>( <i>C. riparius</i> ) | Deformities in mouth<br>parts                     | NOEC<br>(c-)     | 100                              | 10   | 10                             | [8]        |

a: acute exposure; c: chronic exposure; AF: assessment factor (more information in Methodology); EC50 Half maximal effective concentration; NOEC: No Observed Effect Concentration. PNEC sediment was derived from Lowest PNEC freshwater x2.6 (0.651+ 0.019Koc) according to [33]; Koc values are presented in Table S6. .

**Table S4.** PAHs' PNEC freshwater,  $K_{oc}$  values and PNEC sediment.

|                         | CAS<br>Number | PNEC Water<br>$\mu\text{g}\cdot\text{L}^{-1}$ | $K_{oc}$         | PNEC Sediment<br>$\mu\text{g}\cdot\text{kg}^{-1}$ | PNEC Sediment<br>$\mu\text{g}\cdot\text{g}^{-1}$ | PNEC Sediment<br>$\text{ng}\cdot\text{g}^{-1}$ |
|-------------------------|---------------|-----------------------------------------------|------------------|---------------------------------------------------|--------------------------------------------------|------------------------------------------------|
| Naphtalene              | 91-20-3       | 2.00                                          | $2.00\cdot 10^3$ | 88.37                                             | 0.088                                            | 88                                             |
| Acenaphthylene          | 208-96-8      | 0.13                                          | $4.12\cdot 10^3$ | 11.72                                             | 0.011                                            | 11                                             |
| Acenaphthene            | 83-32-9       | 0.38                                          | $7.08\cdot 10^3$ | 58.68                                             | 0.059                                            | 59                                             |
| Fluorene                | 86-73-7       | 0.25                                          | $1.38\cdot 10^4$ | 75.06                                             | 0.075                                            | 75                                             |
| Phenanthrene            | 85-01-8       | 1.30                                          | $1.47\cdot 10^4$ | 415.70                                            | 0.416                                            | 416                                            |
| Anthracene              | 120-12-7      | 0.10                                          | $2.95\cdot 10^4$ | 64.09                                             | 0.064                                            | 64                                             |
| Fluoranthene            | 206-44-0      | $6.30\cdot 10^{-3}$                           | $1.07\cdot 10^5$ | 14.63                                             | 0.015                                            | 15                                             |
| Pyrene                  | 129-00-0      | 0.02                                          | $1.05\cdot 10^5$ | 52.42                                             | 0.052                                            | 52                                             |
| Benz(a)anthracene       | 56-55-3       | $1.20\cdot 10^{-3}$                           | $3.98\cdot 10^5$ | 10.36                                             | 0.010                                            | 10                                             |
| Chrysene                | 218-01-9      | 0.01                                          | $3.98\cdot 10^5$ | 60.40                                             | 0.060                                            | 60                                             |
| Benzo(b+j)fluoranthene  | -             | -                                             | -                | -                                                 | -                                                | -                                              |
| Benzo(k)fluoranthene    | 207-08-9      | $1.70\cdot 10^{-4}$                           | $1.23\cdot 10^6$ | 4.54                                              | 0.005                                            | 5                                              |
| Benzo(a)pyrene          | 50-32-8       | $1.70\cdot 10^{-4}$                           | $1.02\cdot 10^6$ | 3.76                                              | 0.004                                            | 4                                              |
| Dibenz(a,h)anthracene   | 53-70-3       | $1.40\cdot 10^{-4}$                           | $3.80\cdot 10^6$ | 11.54                                             | 0.012                                            | 12                                             |
| Benzo(ghi)perylene      | 191-24-2      | $1.70\cdot 10^{-4}$                           | $9.01\cdot 10^5$ | 3.32                                              | 0.003                                            | 3                                              |
| Indeno(1.2.3-cd) pyrene | 193-39-5      | $1.70\cdot 10^{-4}$                           | $3.47\cdot 10^6$ | 12.80                                             | 0.013                                            | 13                                             |

Sources: PNEC freshwater water values: [174];  $K_{oc}$  values: [175]; PNEC sediment was derived according to the methodology proposed by [61]. .

**Table S5.** PNEC freshwater,  $K_{oc}$  values used to derived PNEC sediment of PCBs and TEF values.

|                  | PNEC Water<br>$\mu\text{g}\cdot\text{L}^{-1}$ | $K_{oc}$         | PNEC Sediments<br>$\text{ng}\cdot\text{g}^{-1}$ | TEF              |
|------------------|-----------------------------------------------|------------------|-------------------------------------------------|------------------|
| Indicator PCBs   |                                               |                  |                                                 |                  |
| PCB28            | $3.19\cdot 10^{-5}$                           | $2.71\cdot 10^4$ | 0.086                                           | -                |
| PCB52            | $3.49\cdot 10^{-5}$                           | $4.48\cdot 10^4$ | 0.015                                           | -                |
| PCB101           | $2.76\cdot 10^{-5}$                           | $2.71\cdot 10^4$ | 0.086                                           | -                |
| PCB138           | $2.47\cdot 10^{-5}$                           | $1.25\cdot 10^5$ | 0.031                                           | -                |
| PCB153           | $2.21\cdot 10^{-5}$                           | $1.23\cdot 10^5$ | 0.027                                           | -                |
| PCB180           | $1.63\cdot 10^{-5}$                           | $2.07\cdot 10^5$ | 0.034                                           | -                |
| Dioxin like PCBs |                                               |                  |                                                 |                  |
| PCB81            | -                                             | -                | -                                               | $5\cdot 10^{-4}$ |
| PCB77            | $1.89\cdot 10^{-6}$                           | $4.48\cdot 10^4$ | 0.008                                           | $1\cdot 10^{-4}$ |
| PCB123           | -                                             | -                | -                                               | $3\cdot 10^{-5}$ |
| PCB118           | -                                             | -                | -                                               | $3\cdot 10^{-5}$ |
| PCB114           | -                                             | -                | -                                               | $3\cdot 10^{-5}$ |
| PCB105           | $3.19\cdot 10^{-5}$                           | $2.71\cdot 10^4$ | 0.086                                           | $3\cdot 10^{-5}$ |
| PCB126           | $3.49\cdot 10^{-5}$                           | $4.48\cdot 10^4$ | 0.016                                           | $5\cdot 10^{-3}$ |
| PCB167           | $2.76\cdot 10^{-5}$                           | $2.71\cdot 10^4$ | 0.086                                           | $3\cdot 10^{-5}$ |
| PCB156           | $2.47\cdot 10^{-5}$                           | $1.25\cdot 10^5$ | 0.031                                           | $3\cdot 10^{-5}$ |
| PCB157           | $2.21\cdot 10^{-5}$                           | $1.23\cdot 10^5$ | 0.027                                           | $3\cdot 10^{-5}$ |
| PCB169           | $1.63\cdot 10^{-5}$                           | $2.07\cdot 10^5$ | 0.034                                           | $3\cdot 10^{-2}$ |
| PCB189           | -                                             | -                | -                                               | $3\cdot 10^{-5}$ |

Sources: PNEC water and PNEC sediment [68]; TEF [71].

**Table S6.** CAS number and main physical-chemical properties of CECs analyzed, in the present study water and in lixiviates from sediment.

|                                  | CAS<br>Number | Molecular<br>Weight<br>g·mol <sup>-1</sup> | log K <sub>ow</sub> | Henry's Law<br>Const.<br>atm·m <sup>3</sup> ·mol <sup>-1</sup> ,<br>25 °C | Vapor<br>Pressure<br>mm Hg,<br>25°C | Water<br>Solubility<br>mg·L <sup>-1</sup> , 25°C | pK <sub>a</sub> | K <sub>oc</sub>      |
|----------------------------------|---------------|--------------------------------------------|---------------------|---------------------------------------------------------------------------|-------------------------------------|--------------------------------------------------|-----------------|----------------------|
| ANALGESICS / ANTI-INFLAMMATORIES |               |                                            |                     |                                                                           |                                     |                                                  |                 |                      |
| Paracetamol                      | 103-90-2      | 151.17                                     | 0.46                | 6.42·10 <sup>-13</sup>                                                    | 7.00·10 <sup>-6</sup>               | 1.40 x10 <sup>4</sup>                            | 9.38            | 21                   |
| Ibuprofen                        | 15687-27-1    | 206.29                                     | 3.97                | 1.50·10 <sup>-7</sup>                                                     | 1.86·10 <sup>-4</sup>               | 21                                               | 4.91            | 3.40·10 <sup>3</sup> |
| Diclofenac                       | 15307-86-5    | 296.15                                     | 4.51                | 4.73·10 <sup>-12</sup>                                                    | 6.14·10 <sup>-8</sup>               | 2.37                                             | 4.15            | 245                  |
| LIPID REGULADOR                  |               |                                            |                     |                                                                           |                                     |                                                  |                 |                      |
| Clofibric Acid                   | 882-09-7      | 214.64                                     | 2.57                | 2.19·10 <sup>-8</sup>                                                     | 1.13·10 <sup>-4</sup>               | 583                                              | 3.18            | -                    |
| PSYCHIATRIC DRUGS                |               |                                            |                     |                                                                           |                                     |                                                  |                 |                      |
| Carbamazepine                    | 298-46-4      | 236.27                                     | 2.45                | 1.08·10 <sup>-10</sup>                                                    | 1.84·10 <sup>-7</sup>               | 17.7                                             | 13.9            | 510                  |
| ANTIBIOTICS                      |               |                                            |                     |                                                                           |                                     |                                                  |                 |                      |
| Ofloxacin                        | 82419-36-1    | 361.37                                     | -0.39               | 4.98·10 <sup>-20</sup>                                                    | 1.55·10 <sup>-13</sup>              | 2.83·10 <sup>4</sup>                             | 5.97            | 4.41·10 <sup>4</sup> |
| STIMULANT ALKALOID               |               |                                            |                     |                                                                           |                                     |                                                  |                 |                      |
| Caffeine                         | 58-08-2       | 194.19                                     | -0.07               | 1.90·10 <sup>-19</sup>                                                    | 15 (89°C)                           | 2.16·10 <sup>4</sup>                             | 10.4            | 71                   |
| MUSK FRAGRANCES                  |               |                                            |                     |                                                                           |                                     |                                                  |                 |                      |
| Galaxolide (HHCB)                | 1222-05-5     | 258.40                                     | 5.9                 | 1.06·10 <sup>-4</sup>                                                     | 5.45·10 <sup>-4</sup>               | 1.75                                             | -               | 1.90·10 <sup>4</sup> |
| Tonalide (AHTN)                  | 1506-02-1     | 248.40                                     | 5.7                 | 1.40·10 <sup>-4</sup>                                                     | 5.10·10 <sup>-4</sup>               | 1.25                                             | -               | 2.00·10 <sup>4</sup> |
| PLASTICIZER                      |               |                                            |                     |                                                                           |                                     |                                                  |                 |                      |
| Bisphenol A                      | 80-05-7       | 228.29                                     | 3.32                | 1.0·10 <sup>-11</sup>                                                     | 3.91·10 <sup>-7</sup>               | 120                                              | 9.6             | 251-3886             |

Sources: [176].

**Table S7.** CAS number and main physical-chemical properties of the PAHs analyzed in the sediments of the sampling sites.

|                         | CAS Number | Molecular<br>Weight g·mol <sup>-1</sup> | Log<br>Kow | Henry's Law Constant<br>atm·m <sup>3</sup> ·mol <sup>-1</sup> , 25 °C | Vapour<br>Pressure<br>mm Hg, 25°C | Water Solubility<br>mg·L <sup>-1</sup> , 25°C |
|-------------------------|------------|-----------------------------------------|------------|-----------------------------------------------------------------------|-----------------------------------|-----------------------------------------------|
| Naphtalene              | 91-20-3    | 128.17                                  | 3.30       | 4.40·10 <sup>-4</sup>                                                 | 8.5·10 <sup>-2</sup>              | 31                                            |
| Acenaphthylene          | 208-96-8   | 152.20                                  | 3.94       | 1.14·10 <sup>-4</sup>                                                 | 6.68·10 <sup>-3</sup>             | 16.1                                          |
| Acenaphthene            | 83-32-9    | 154.21                                  | 3.92       | 1.84·10 <sup>-4</sup>                                                 | 2.15·10 <sup>-3</sup>             | 3.9                                           |
| Fluorene                | 86-73-7    | 166.22                                  | 4.18       | 9.62·10 <sup>-5</sup>                                                 | 6.00·10 <sup>-4</sup>             | 1.69                                          |
| Phenanthrene            | 85-01-8    | 178.23                                  | 4.46       | 4.23·10 <sup>-5</sup>                                                 | 1.21·10 <sup>-4</sup>             | 1.15                                          |
| Anthracene              | 120-12-7   | 178.23                                  | 4.45       | 5.56·10 <sup>-5</sup>                                                 | -                                 | 4,34·10 <sup>-2</sup> (23°C)                  |
| Fluoranthene            | 206-44-0   | 202.26                                  | 5.16       | 8.86·10 <sup>-6</sup>                                                 | 9.22·10 <sup>-6</sup>             | 0.26                                          |
| Pyrene                  | 129-00-0   | 202.26                                  | 4.88       | 1.19·10 <sup>-5</sup>                                                 | 1.19·10 <sup>-5</sup>             | 0.14                                          |
| Benz(a)anthracene       | 56-55-3    | 228.29                                  | 5.76       | 1.20·10 <sup>-5</sup>                                                 | 2.10·10 <sup>-7</sup>             | 9.40·10 <sup>-3</sup>                         |
| Chrysene                | 218-01-9   | 228.29                                  | 5.81       | 5.23·10 <sup>-6</sup>                                                 | 6.23·10 <sup>-9</sup>             | 2.00·10 <sup>-3</sup>                         |
| Benzo(b+j)fluoranthene  | -          | -                                       | -          | -                                                                     | -                                 | -                                             |
| Benzo(k)fluoranthene    | 207-08-9   | 252.32                                  | 6.11       | 5.84·10 <sup>-7</sup>                                                 | -                                 | 8.00·10 <sup>-4</sup>                         |
| Benzo(a)pyrene          | 50-32-8    | 252.31                                  | 6.13       | 4.57·10 <sup>-7</sup>                                                 | -                                 | 1.62·10 <sup>-3</sup>                         |
| Dibenz(a,h)anthracene   | 53-70-3    | 278.35                                  | 6.75       | 1.23·10 <sup>-7</sup>                                                 | 1.00·10 <sup>-10</sup>            | 2.49·10 <sup>-3</sup>                         |
| Benzo(ghi)perylene      | 191-24-2   | 276.34                                  | 6.63       | 3.31·10 <sup>-7</sup>                                                 | 1.00·10 <sup>-10</sup>            | 2.60·10 <sup>-4</sup>                         |
| Indeno(1.2.3-cd) pyrene | 193-39-5   | 276.34                                  | 6.70       | 3.48·10 <sup>-7</sup>                                                 | 1.25·10 <sup>-10</sup>            | 1.90·10 <sup>-4</sup>                         |

Sources: [176].

**Table S8.** CAS number and main physical-chemical properties of the PCBs analyzed in the sediments of the sampling sites.

|                  | CAS Number | Molecular Weight g·mol <sup>-1</sup> | Log K <sub>ow</sub> | Henry's Law Constant atm·m <sup>3</sup> ·mol <sup>-1</sup> , 25 °C | Vapour Pressure mm Hg, 25°C | Water Solubility mg L <sup>-1</sup> , 25°C |
|------------------|------------|--------------------------------------|---------------------|--------------------------------------------------------------------|-----------------------------|--------------------------------------------|
| Indicator PCBs   |            |                                      |                     |                                                                    |                             |                                            |
| PCB28            | 7012-37-5  | 257.55                               | 5.62                | 2.00·10 <sup>-4</sup>                                              | 1.95·10 <sup>-4</sup>       | 0.27                                       |
| PCB52            | 35693-99-3 | 291.99                               | 6.09                | 2.00·10 <sup>-4</sup>                                              | 8.45·10 <sup>-6</sup>       | 1.53·10 <sup>-2</sup>                      |
| PCB101           | 37680-73-2 | 326.44                               | 6.8                 | 9.00·10 <sup>-5</sup>                                              | 2.52·10 <sup>-5</sup>       | 1.54·10 <sup>-2</sup>                      |
| PCB138           | 35065-28-2 | 360.88                               | 7.44                | 2.10·10 <sup>-5</sup>                                              | 3.80·10 <sup>-6</sup>       | 1.50·10 <sup>-3</sup>                      |
| PCB153           | 35065-27-1 | 360.88                               | 7.75                | 2.30·10 <sup>-5</sup>                                              | 3.43·10 <sup>-6</sup>       | 9.50·10 <sup>-4</sup>                      |
| PCB180           | 35065-29-3 | 395.33                               | 8.27                | 1.00·10 <sup>-5</sup>                                              | 9.77·10 <sup>-7</sup>       | 3.85·10 <sup>-3</sup>                      |
| Dioxin like PCBs |            |                                      |                     |                                                                    |                             |                                            |
| PCB81            | 70362-50-4 | 291.99                               | -                   | -                                                                  | -                           | -                                          |
| PCB77            | 32598-13-3 | 291.99                               | 6.63                | 9.40·10 <sup>-6</sup>                                              | 1.64·10 <sup>-5</sup>       | 5.69·10 <sup>-4</sup>                      |
| PCB123           | 65510-44-3 | 326.44                               | -                   | -                                                                  | -                           | -                                          |
| PCB118           | 31508-00-6 | 326.44                               | 7.12                | 2.88·10 <sup>-4</sup>                                              | 8.97·10 <sup>-6</sup>       | 1.34·10 <sup>-2</sup>                      |
| PCB114           | 74472-37-0 | 326.44                               | 6.98                | -                                                                  | -                           | 1.60·10 <sup>-2</sup>                      |
| PCB105           | 32598-14-4 | 326.44                               | 6.79                | 8.25·10 <sup>-4</sup>                                              | 6.53·10 <sup>-6</sup>       | 3.4·10 <sup>-3</sup>                       |
| PCB126           | 57465-28-8 | 326.44                               | -                   | -                                                                  | -                           | -                                          |
| PCB167           | 52663-72-6 | 360.88                               | 7.5                 | 6.85·10 <sup>-5</sup>                                              | 5.81·10 <sup>-7</sup>       | 2.23·10 <sup>-3</sup>                      |
| PCB156           | 38380-08-4 | 360.88                               | 7.6                 | 1.43·10 <sup>-4</sup>                                              | 1.61·10 <sup>-6</sup>       | 5.33·10 <sup>-3</sup>                      |
| PCB157           | 69782-90-7 | 360.88                               | 7.41                | 6.85·10 <sup>-5</sup>                                              | 5.81·10 <sup>-7</sup>       | 5.10·10 <sup>-4</sup>                      |
| PCB169           | 32774-16-6 | 360.88                               | 7.41                | 6.85·10 <sup>-5</sup>                                              | 5.81·10 <sup>-7</sup>       | 5.10·10 <sup>-4</sup>                      |
| PCB189           | 39635-31-9 | 395.33                               | 8.27                | -                                                                  | -                           | 7.53·10 <sup>-4</sup>                      |

Sources: [176].
